# Supplementary material for: Identification of Quorum Sensing Activators and Inhibitors in The Marine Sponge Sarcotragus spinosulus
Source: PubMed Central journal article supplement (PMC7074164; doi:10.3390/md18020127), 2020-02-20
Supplement: marinedrugs-18-00127-s001.pdf [file marinedrugs-18-00127-s001.pdf]

# Supplementary Information

## Identification of quorum sensing activators and inhibitors in the marine sponge *Sarcotragus spinosulus*

Kumar Saurav<sup>1,2,3</sup>, Nicola Borbone<sup>2</sup>, Ilia Burgsdorf<sup>1</sup>, Roberta Teta<sup>2</sup>, Alessia Caso<sup>2</sup>, Rinat Bar-Shalom<sup>1</sup>, Germana Esposito<sup>2</sup>, Maya Britstein<sup>1</sup>, Laura Steindler<sup>1</sup> and Valeria Costantino<sup>2\*</sup>.

<sup>1</sup>Department of Marine Biology, Leon H. Charney School of Marine Sciences, University of Haifa, Mt. Carmel 31905, Haifa, Israel. [sauravverma17@gmail.com](mailto:sauravverma17@gmail.com) (K.S); [burgsdorf84@gmail.com](mailto:burgsdorf84@gmail.com) (I.B); [rbar-shal@univ.haifa.ac.il](mailto:rbar-shal@univ.haifa.ac.il) (R.B.S); [mayabritstein@gmail.com](mailto:mayabritstein@gmail.com) (M.B); [lsteindler@univ.haifa.ac.il](mailto:lsteindler@univ.haifa.ac.il) (L.S)

<sup>2</sup>The Blue Chemistry Lab, Dipartimento di Farmacia, Università degli Studi di Napoli Federico II, Via D. Montesano 49, 80131, Napoli, Italy. [sauravverma17@gmail.com](mailto:sauravverma17@gmail.com) (K.S); [nicola.borbone@unina.it](mailto:nicola.borbone@unina.it) (N.B); [roberta.teta@unina.it](mailto:roberta.teta@unina.it) (R.T); [alessia.caso@unina.it](mailto:alessia.caso@unina.it) (A.C); [germana.esposito@unina.it](mailto:germana.esposito@unina.it) (G.E); [valeria.costantino@unina.it](mailto:valeria.costantino@unina.it) (V.C)

<sup>3</sup>Laboratory of Algal Biotechnology-Centre Algatech, Institute of Microbiology of the Czech Academy of Sciences, Opatovický mlýn, Novohradská 237, 379 81, Třeboň, Czech Republic. [sauravverma17@gmail.com](mailto:sauravverma17@gmail.com) (K.S)

**Figure S1.** Extracted ion chromatograms at  $m/z$ 102.05, corresponding to deacylated homoserine lactone, from the LC-HRMS analysis of the microbial enriched sponge fractions.

**Figure S2.** HR-MS and HR-MS/MS spectra of the new compounds C19-AHL and OC19-AHL.

**Figure S3.** HR-MS spectra of compounds **1** and **2**.

**Figure S4.** <sup>1</sup>HNMR spectra of compounds **1** and **2**.

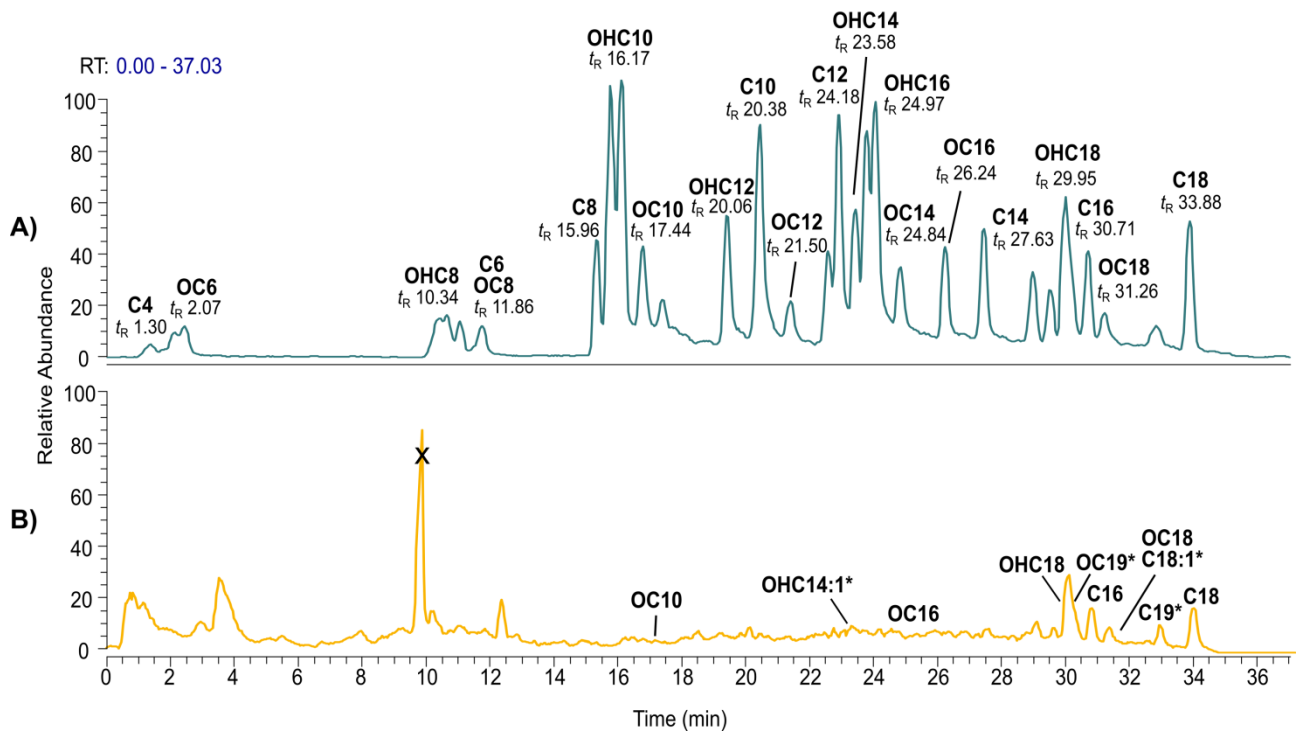

**Figure S1:** Extracted ion chromatograms at  $m/z$ 102.05, corresponding to deacylated homoserine lactone, from the LC-HRMS analysis of the microbial enriched sponge fractions: A) standard mixture of synthetic AHLs (blue trace); B) microbial enriched sponge fraction S2 (pink trace). Asterisk-marked AHLs (\*) were only tentatively described.

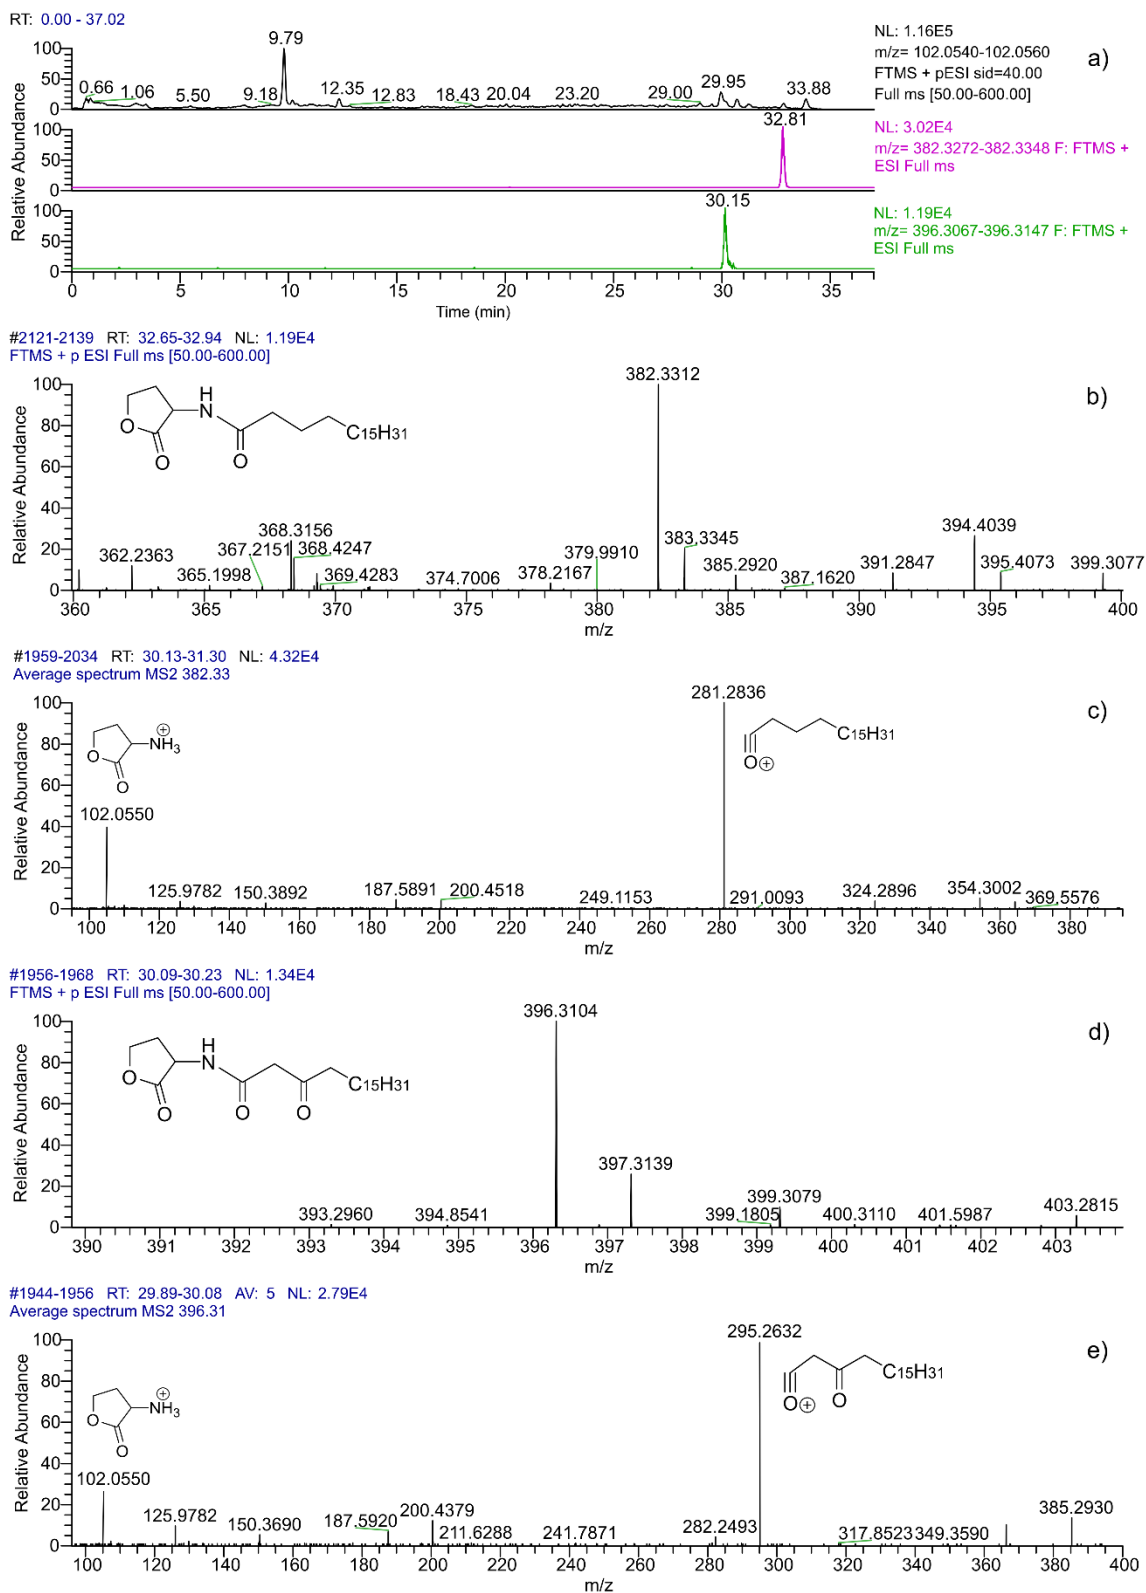

**Figure S2:**HR-MS and HR-MS/MS spectra of the new compounds C19-AHL and OC19-AHL; a) extracted ion chromatogram from the LC-HRMS analysis of the sponge enriched fraction S2 at  $m/z$  102.0550 (black trace), corresponding to deacylated homoserine lactone,  $m/z$  382.3312 (pink trace), corresponding to C19-AHL and  $m/z$  396.3104 (green trace), corresponding to OC19-AHL; b), c) HR-MS and HR-MS/MS spectra of C19-AHL; d), e) HR-MS and HR-MS/MS spectra of OC19-AHL.

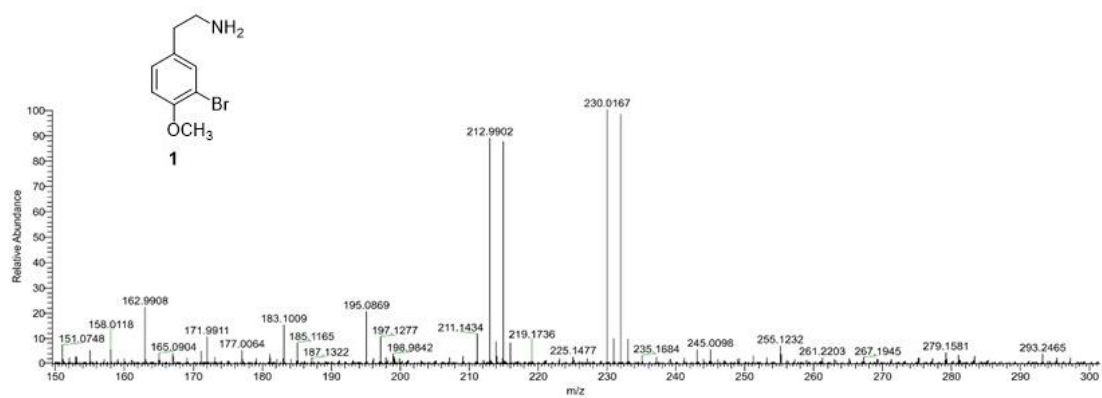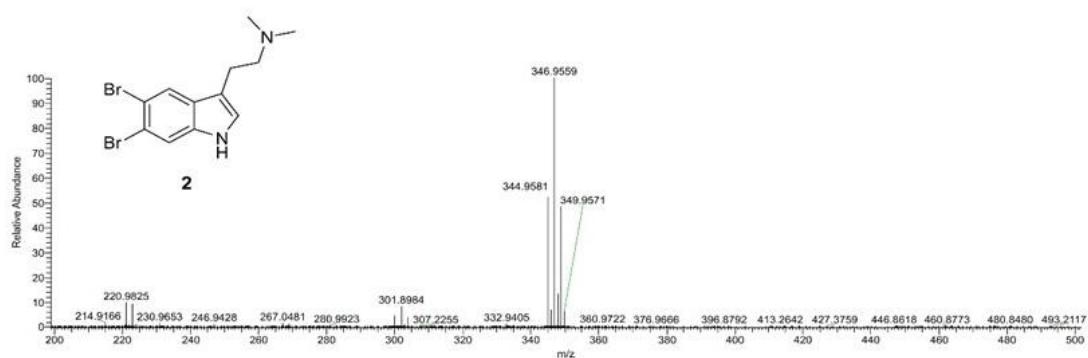

Figure S3:HR-MS spectra of compounds 1 and 2.

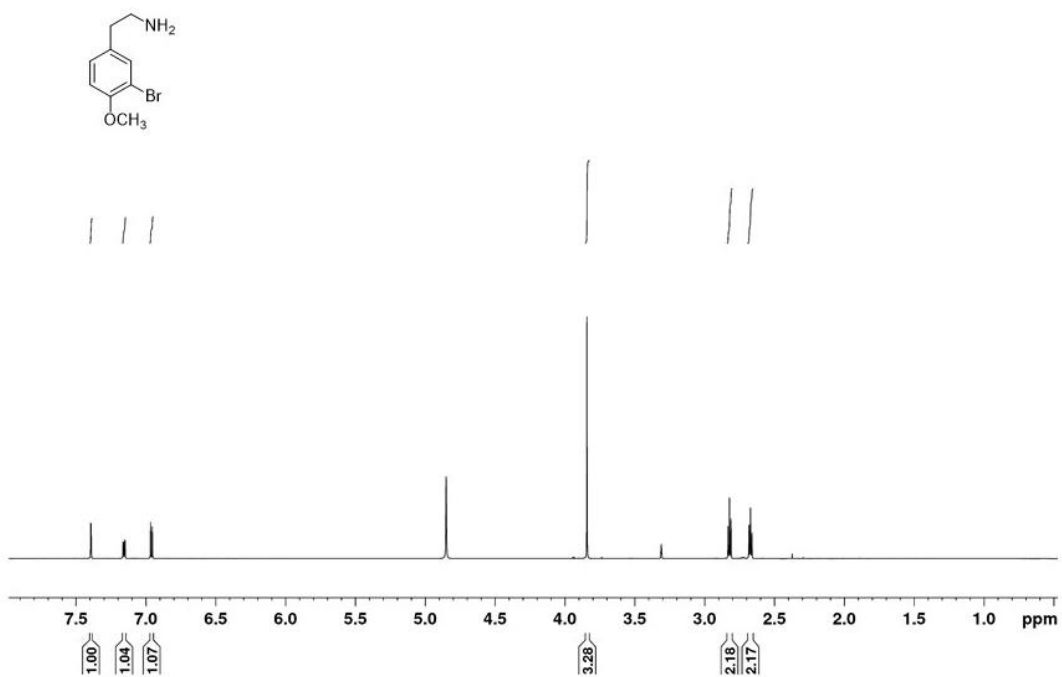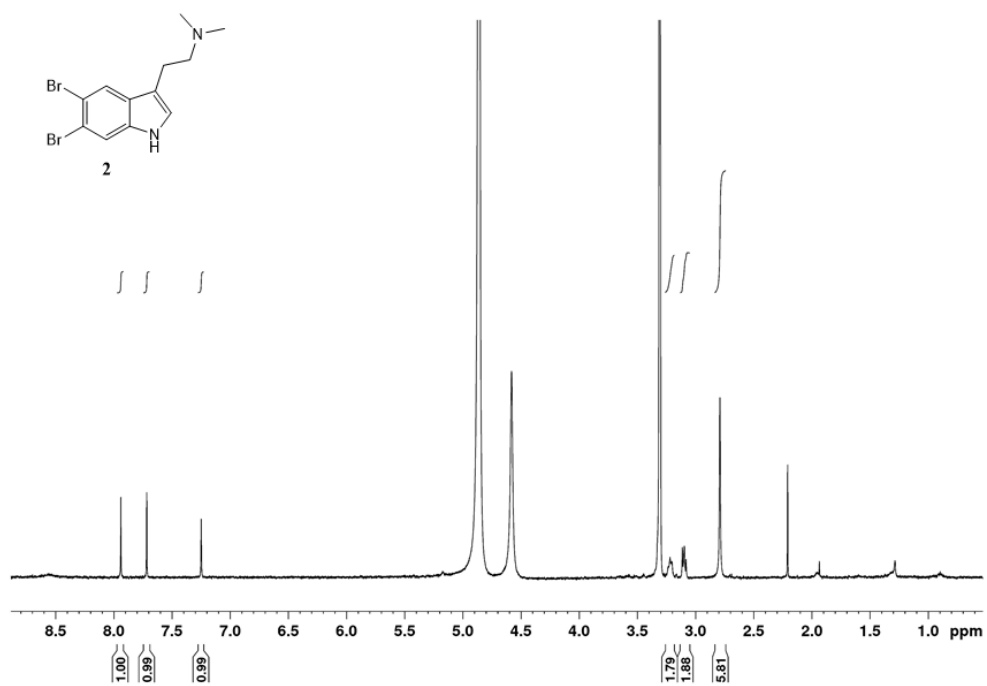

Figure S4:  $^1\text{H}$ NMR spectra of compounds 1 and 2.
